# Supplementary material
Source: Springer Nature journal article supplement (https://www.springermedizin.de/resource/supplementary/12935_2009_270_MOESM2_ESM.pdf/9540188)

Growth inhibition rate

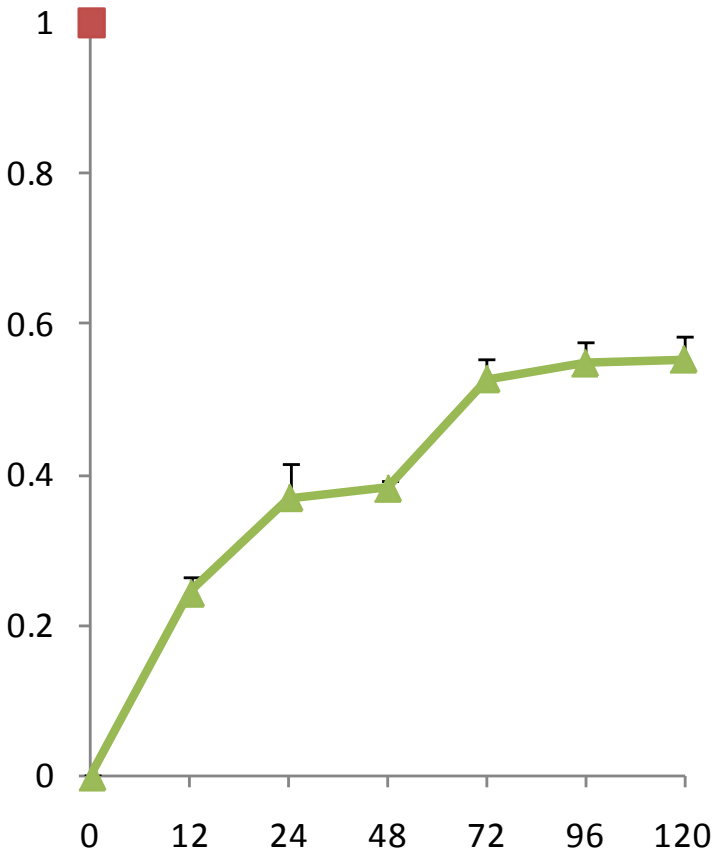

Incubation time (hour)

Supplement: MOESM2 [file 9540188]
